# Supplementary material
Source: Springer Nature journal article supplement (https://www.springermedizin.de/resource/supplementary/12916_2012_764_MOESM4_ESM.pdf/9598658)
Supplement: MOESM4 [file 9598658]

## Cross-sectional S4

logistic regression

CS vs NS  
smoking related  
metabolites

FS vs NS  
irreversible  
metabolites

CS vs FS  
reversible  
metabolites

linear regression

FS  
slowly reversible  
metabolites  
(cessation time  
related)

## longitudinal S4 → F4

linear mixed model

CS, Quitter and NS  
reversible metabolites  
  
(associated with  
change of smoking  
status)

literature, database

Protein-metabolite  
network
